# Supplementary material for: Metformin induces lipogenic differentiation in myofibroblasts to reverse lung fibrosis
Source: PubMed Central journal article supplement (PMC6611870; doi:10.1038/s41467-019-10839-0), 2019-07-05
Supplement: 41467_2019_10839_MOESM1_ESM.pdf [file 41467_2019_10839_MOESM1_ESM.pdf]

## **Supplementary Information**

### **Metformin induces lipogenic differentiation in myofibroblasts to reverse lung fibrosis**

Kheirollahi et al.

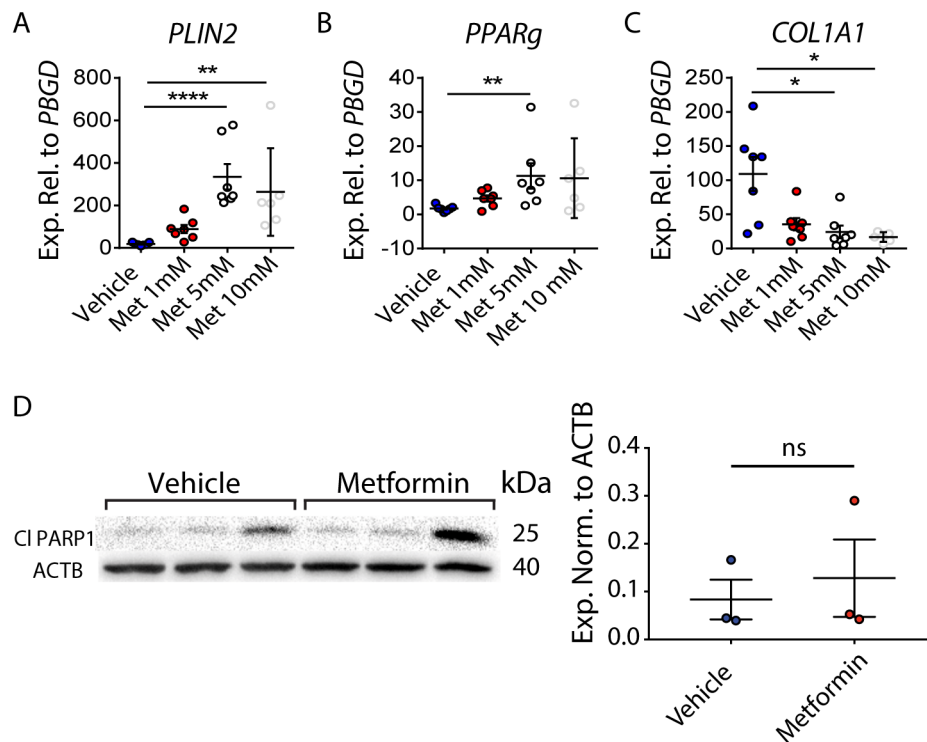

**Supplementary Figure 1. Dose-finding study for treating human IPF lung fibroblasts with metformin. (A-C)** qPCR analysis of *PLIN2*, *PPARγ* and *COL1A1* in IPF fibroblasts treated with 1 mM, 5 mM or 10 mM metformin or vehicle. **(D)** Western blot showing the expression of the apoptotic marker cleaved PARP1 in fibroblasts treated with vehicle or 5 mM metformin. Quantification of the immunoblot is shown in the right panel. Each data point corresponds to one patient and error bars indicate s.e.m. (A-C) n=6-7 per group, (D): n=3 per group. Kruskal-Wallis test was used in (A-C) and Mann-Whitney test was used in (D). \* P<0.05, \*\*P<0.01, \*\*\*\*P<0.0001. ns: Not significant.

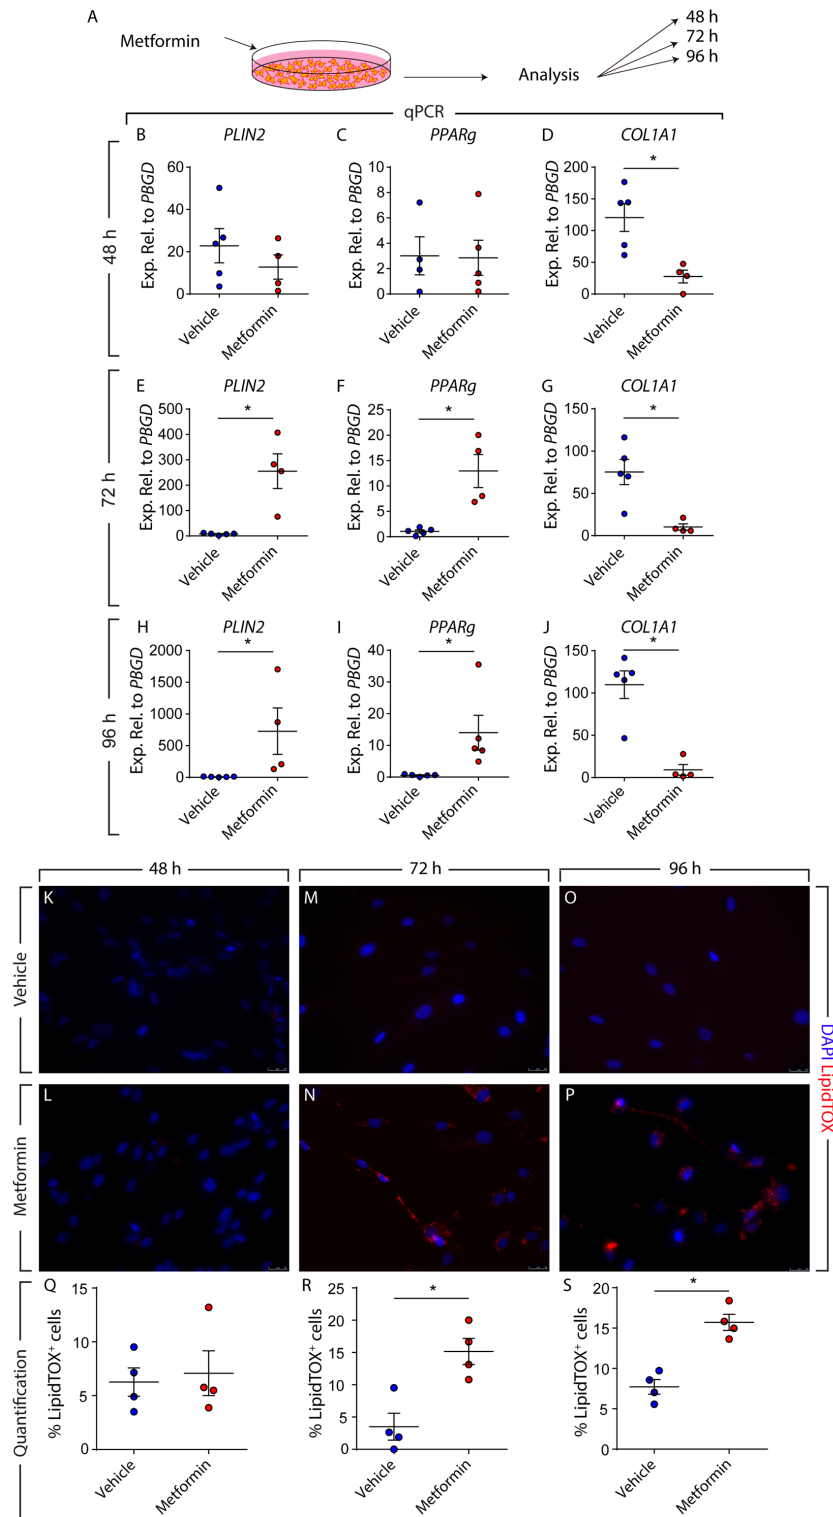

**Supplementary Figure 2. Metformin induces lipogenic differentiation in IPF fibroblasts starting at 72 h after treatment. (A)** Schematic representation of the experimental setup. **(B-D)** qPCR analysis of *PLIN2*, *PPARg* and *COL1A1* in IPF fibroblasts treated with 5 mM metformin for 48 h. A Similar analysis is shown after 72 **(E-G)** and 96 h **(H-J)**. **(K-P)** Staining of metformin- and vehicle-treated cells with LipidTOX (red) and DAPI (blue) at 48, 72 and 96 h. **(Q-S)** Quantification of lipid-droplet accumulation is shown in (K-P). Scale bars: (K-P) 25  $\mu$ m. Each data point corresponds to one patient and error bars indicate s.e.m. (Q-S) n=4 per group. Mann-Whitney test was used in (B-J, Q-S). \* P<0.05.

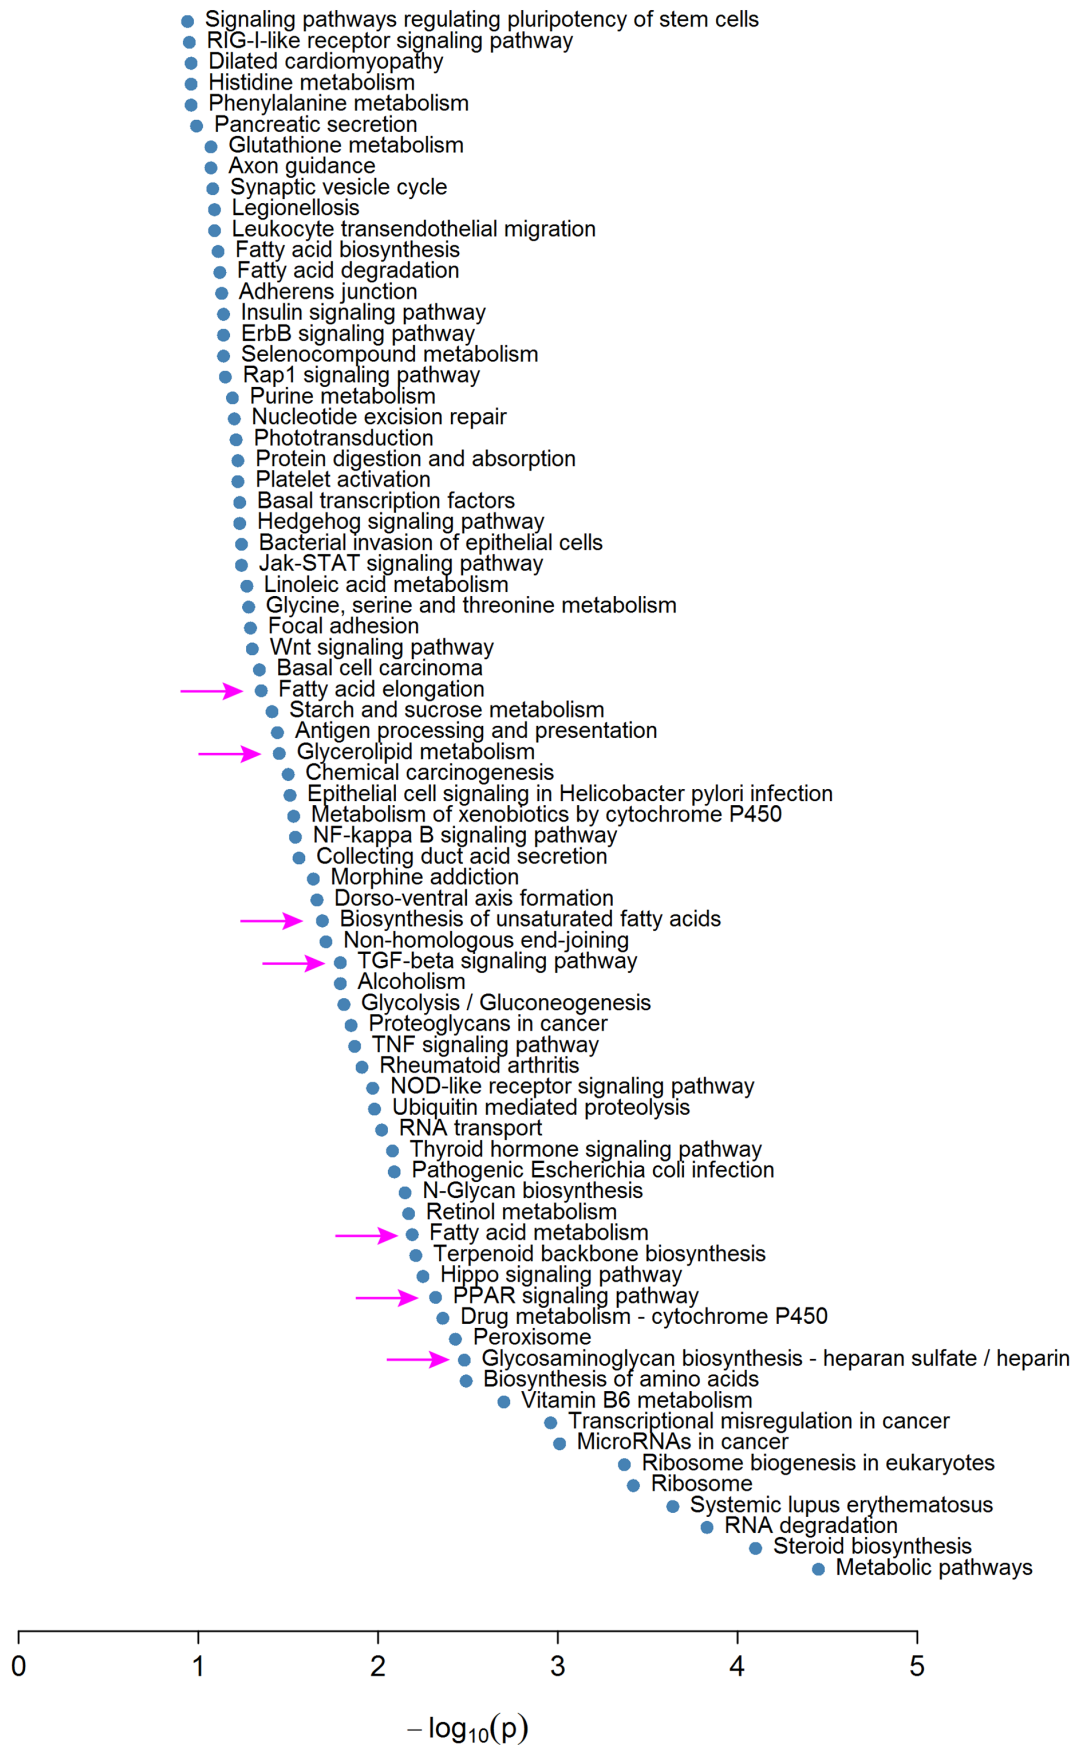

**Supplementary Figure 3. KEGG significance plot showing signaling pathway alterations in metformin- and vehicle-treated human IPF lung fibroblasts.** The top 75 candidate pathways are shown. Selected pathways are marked by the arrows. Vehicle-treated group: n=4, metformin-treated group: n=3.

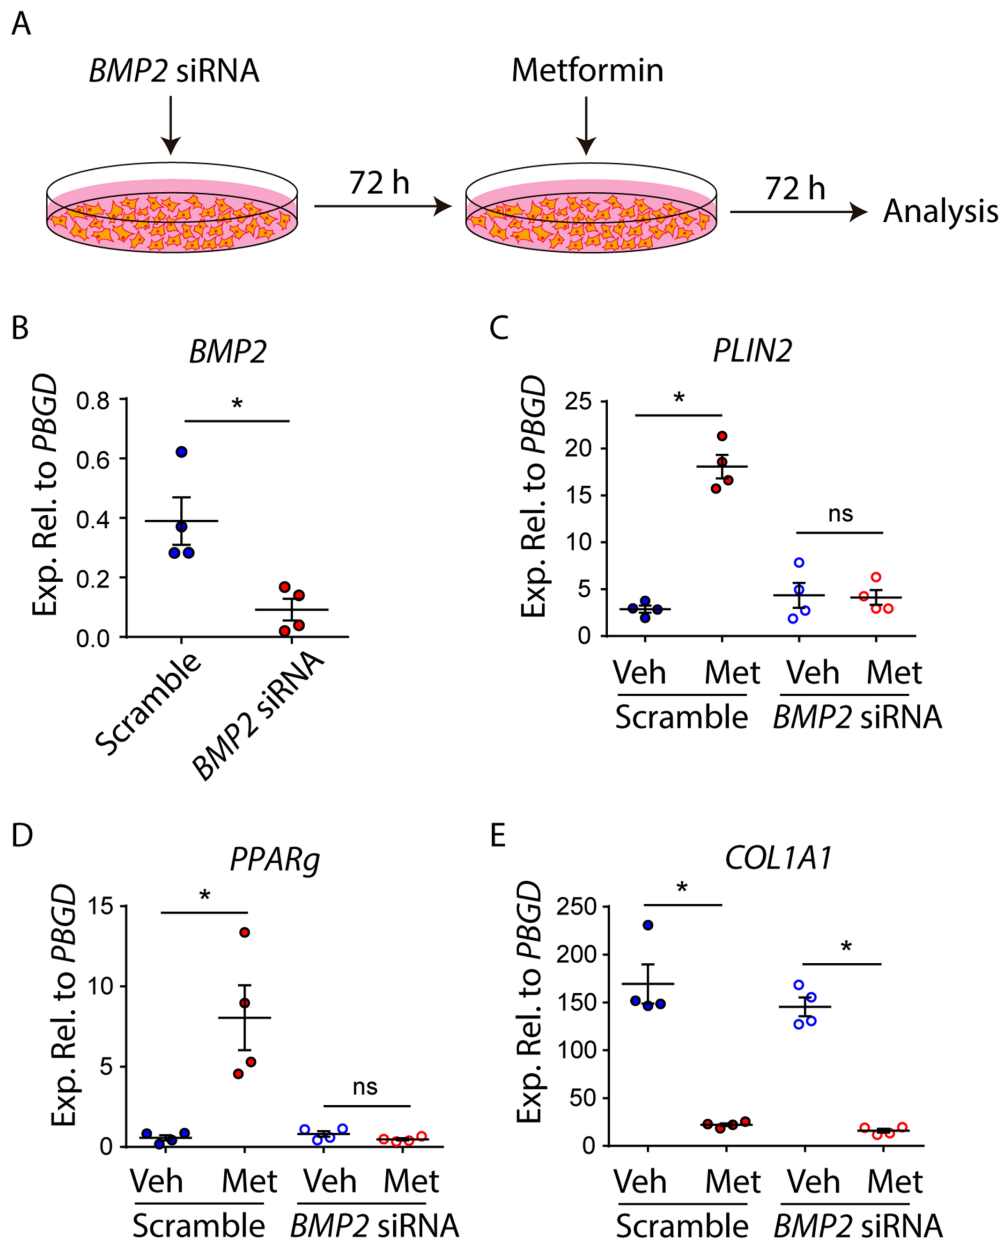

**Supplementary Figure 4. *BMP2* knockdown inhibits metformin-induced lipogenic differentiation in IPF lung fibroblasts.** (A) Schematic representation of the experimental setup. (B-E) qPCR analysis of *BMP2*, *PLIN2*, *PPAR $\gamma$*  and *COL1A1* in human IPF lung fibroblasts treated with metformin in the presence of scramble or *BMP2* siRNA. Each data point corresponds to one patient and error bars indicate s.e.m. n=4 per group. Mann-Whitney test was used in (B) and Kruskal-Wallis test was used in (C-E). \* P<0.05. Met: Metformin, ns: Not significant, Veh: Vehicle.

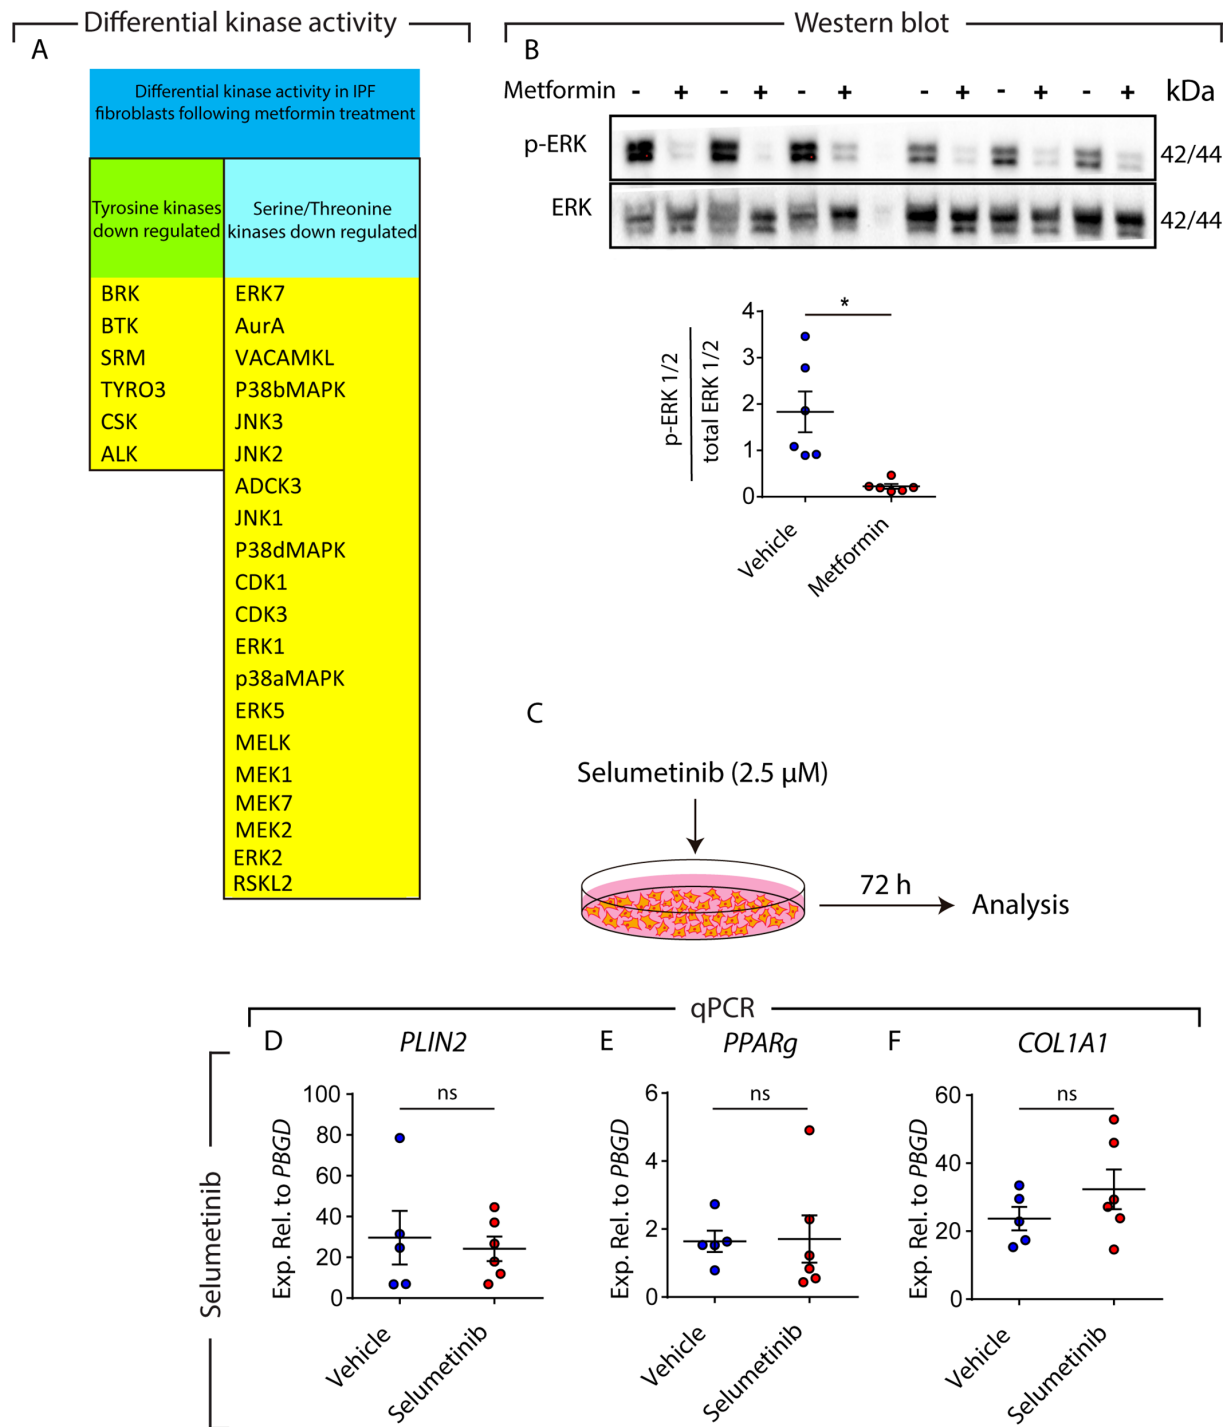

**Supplementary Figure 5. Inhibition of ERK phosphorylation does not mediate the antifibrotic effect of metformin in human IPF lung fibroblasts.** (A) Kinase activity assay as determined by PamStation analysis. (B) Western blot showing decreased p-ERK levels in response to metformin treatment. Quantification of p-ERK levels is shown in the lower panel. (C) Schematic representation of the experimental setup. (D-F) qPCR analysis of *PLIN2*, *PPARg* and *COL1A1* in IPF fibroblasts treated with selumetinib or vehicle for 72 h. Each data point corresponds to one patient and error bars indicate s.e.m. (B) n=6 per group. (D-F) Vehicle-treated group: n=5, Selumetinib-treated group: n=6. Mann-Whitney test was used. \* P<0.05. ns: Not significant.

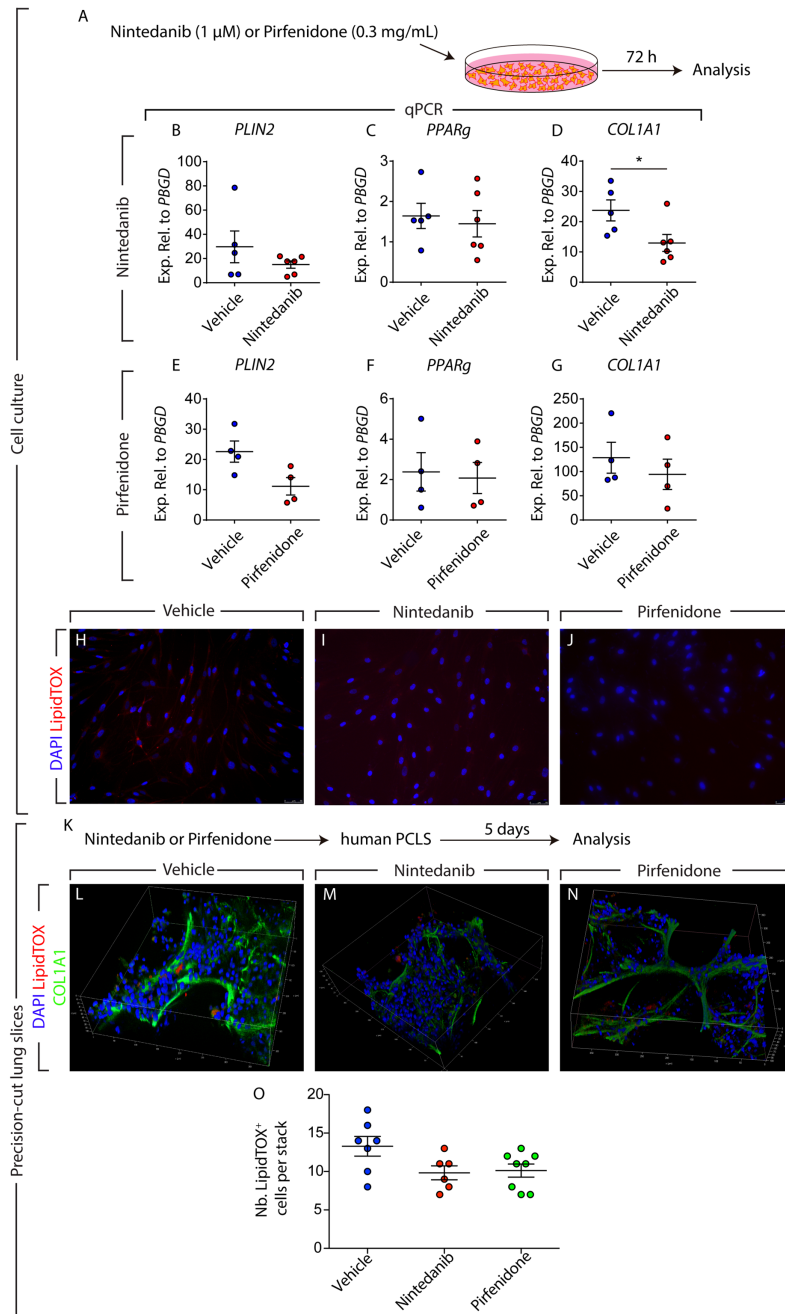

**Supplementary Figure 6. Nintedanib and pirfenidone do not induce lipogenic differentiation in IPF lung fibroblasts.** **(A)** Schematic representation of the experimental setup. **(B-D)** qPCR analysis of *PLIN2*, *PPAR $\gamma$*  and *COL1A1* in human IPF lung fibroblasts treated with nintedanib. A similar analysis for pirfenidone-treated cells is shown in **(E-G)**. **(H-J)** Staining of nintedanib-, pirfenidone- and vehicle-treated cells with LipidTOX (red) and DAPI (blue). **(K)** Schematic representation of the experimental setup using precision-cut lung slices (PCLS). **(L-N)** 3D-reconstruction of z-stacks of nintedanib-, pirfenidone- and vehicle-treated PCLS stained for COL1A1 (green) and lipid droplets (red). **(O)** Quantification of LipidTOX<sup>+</sup> cells as determined by manual counting across z-stacks. Scale bars: (H-J) 50  $\mu$ m. (B-G) Each data point within a given group corresponds to one patient. (B-D) Vehicle-treated group: n=5, nintedanib-treated group: n=6. (E-G) n=4 per group. (O) Each data point within a given group corresponds to one z-stack and error bars indicate s.e.m. Vehicle-treated group: n=7, nintedanib-treated group: n=6, pirfenidone-treated group: n=8. Mann-Whitney test was used in (B-G) and Kruskal-Wallis test was used in (O). \* P<0.05.
