# Supplementary material for: Metformin induces lipogenic differentiation in myofibroblasts to reverse lung fibrosis
Source: PubMed Central journal article supplement (PMC6611870; doi:10.1038/s41467-019-10839-0), 2019-07-05
Supplement: 41467_2019_10839_MOESM5_ESM.pdf [file 41467_2019_10839_MOESM5_ESM.pdf]

**Related to Figure 5. AMPK knockdown using siRNA.**

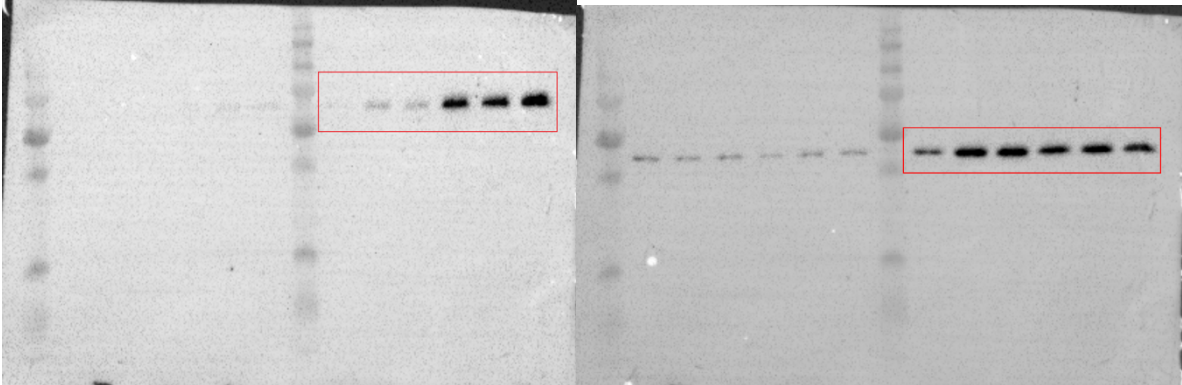

WB: AMPK (63 kDa)

WB: ACTB (42 kDa)

**Related to Figure 6. PPARg knockdown using siRNA**

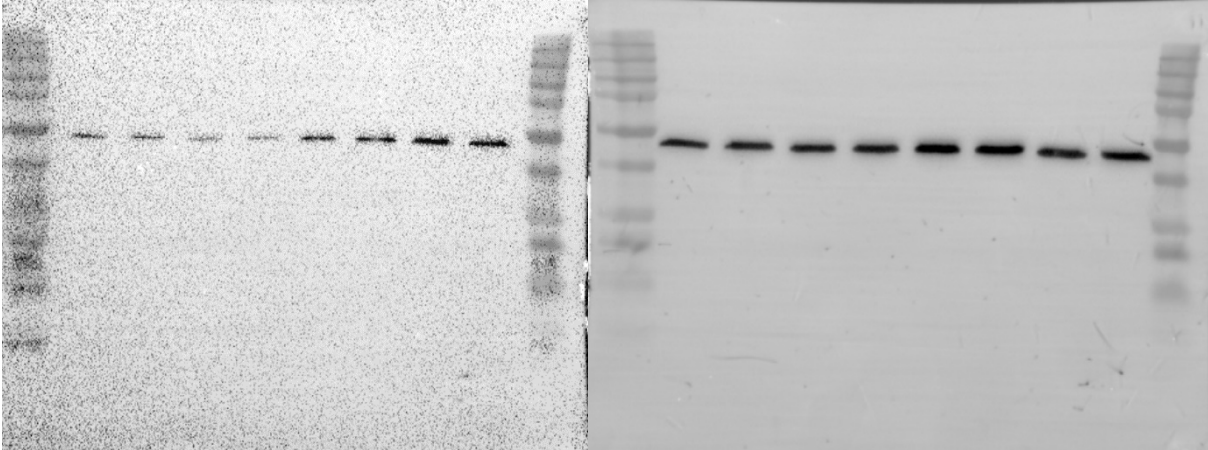

WB: PPARg (~50 kDa)

WB: ACTB (42 kDa)

**Related to Figure 7. Treatment of human lung fibroblasts with metformin**

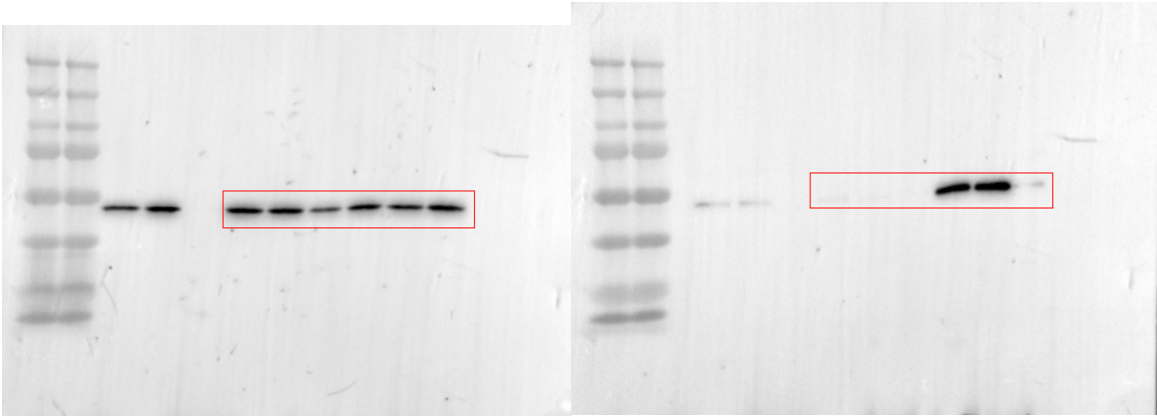

WB: PPARγ (~50kDa)

WB: p-PPARγ (~50kDa)

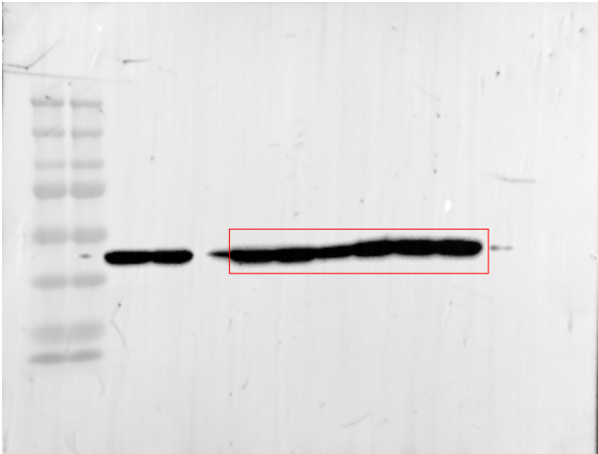

WB: ACTB (42 kDa)

**Related to Figure 7. Phosphorylation of SMAD1/5/8**

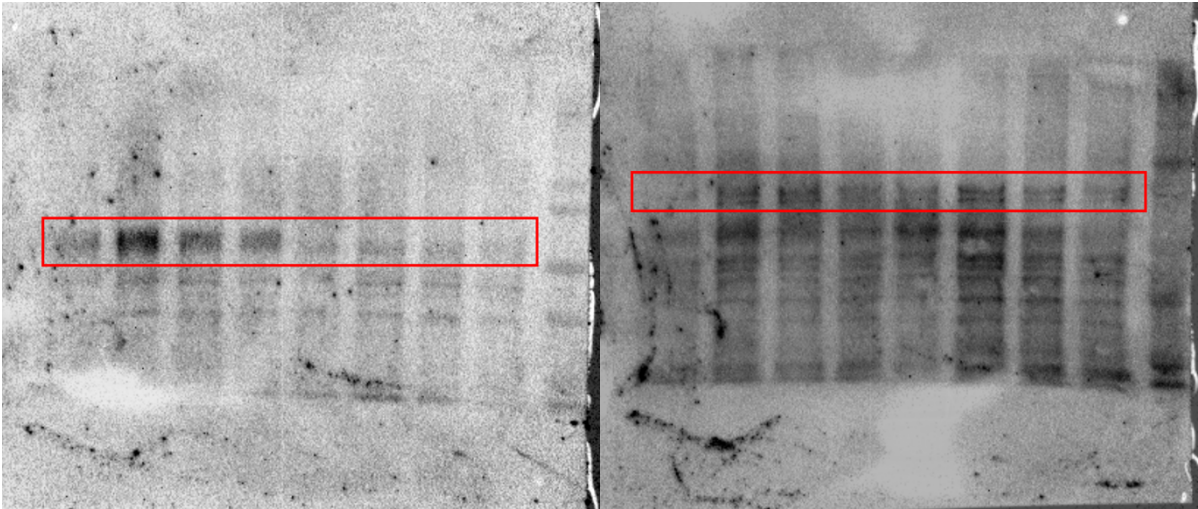

WB: p-SMAD1/5/8 (~60kDa)

WB: Total SMAD1/5/8 (~60kDa)

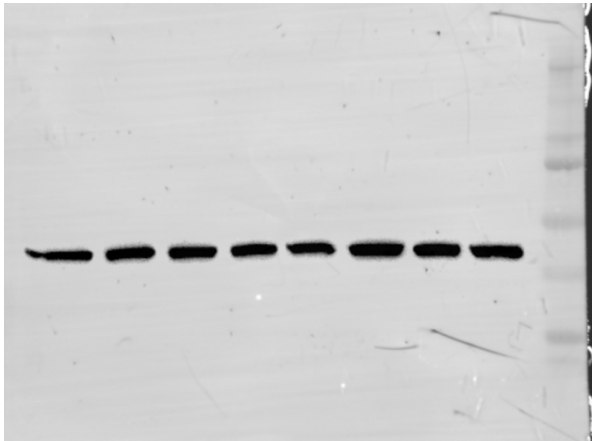

WB: ACTB (42 kDa)

**Related to Figure S1.**

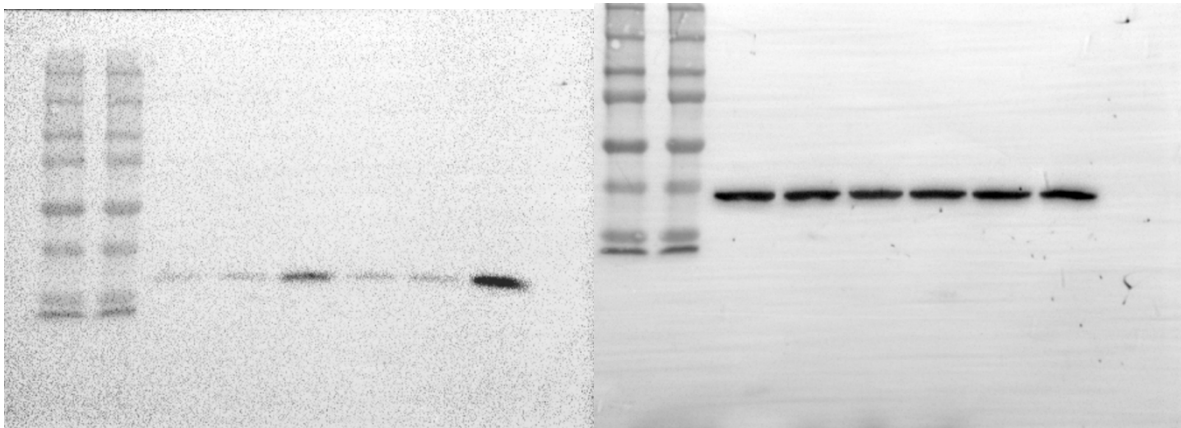

WB: cleaved PARP1 (~25kDa)

WB: ACTB (42 kDa)

**Related to Figure S5.**

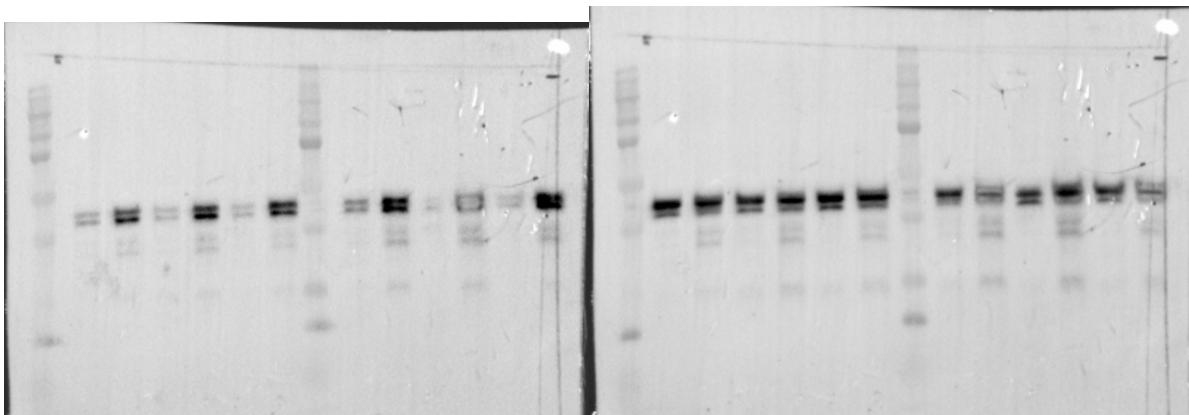

WB: p-ERK1/2 (40 kDa)

WB: Total ERK1/2 (40 kDa)
