# Supplementary material for: Metformin induces lipogenic differentiation in myofibroblasts to reverse lung fibrosis
Source: PubMed Central journal article supplement (PMC6611870; doi:10.1038/s41467-019-10839-0), 2019-07-05
Supplement: 41467_2019_10839_MOESM7_ESM.pdf [file 41467_2019_10839_MOESM7_ESM.pdf]

## **Legends for supplementary movies**

**Supplementary Movie 1. Time-lapse imaging of vehicle-treated human IPF lung fibroblasts for 68 h.** Brightfield and fluorescent images (for red LipidTOX stain) were acquired every 1 h. Scale bar: 100  $\mu\text{m}$ .

**Supplementary Movie 2. Time-lapse imaging of rhTGF $\beta$ 1-treated human IPF lung fibroblasts for 68 h.** Brightfield and fluorescent images (for red LipidTOX stain) were acquired every 1 h. Scale bar: 100  $\mu\text{m}$ .

**Supplementary Movie 3. Time-lapse imaging of metformin-treated human IPF lung fibroblasts for 68 h.** Brightfield and fluorescent images (for red LipidTOX stain) were acquired every 1 h. Scale bar: 100  $\mu\text{m}$ .
